# Supplementary material for: MiR-99a-5p up-regulates LDLR and functionally enhances LDL-C uptake via suppressing PCSK9 expression in human hepatocytes
Source: Frontiers journal article supplement (doi:10.3389/fgene.2024.1469094), 2024-11-19
Supplement: Data_Sheet_3.pdf [file Data_Sheet_3.pdf]

This document certifies that the manuscript

**MiR-99a-5p up-regulates LDLR and functionally enhances LDL-C uptake via suppressing PCSK9 expression in human hepatocytes**

prepared by the authors

**Xuemei Chen**

was edited for proper English language, grammar, punctuation, spelling, and overall style by one or more of the highly qualified English speaking editors at AJE.

This certificate was issued on **October 26, 2024** and may be verified on the [AJE website](https://aje.com) using the verification code **ED64-E965-5B67-76CB-8160**.

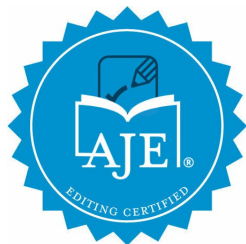

Neither the research content nor the authors' intentions were altered in any way during the editing process. Documents receiving this certification should be English-ready for publication; however, the author has the ability to accept or reject our suggestions and changes. To verify the final AJE edited version, please visit our verification page at [aje.com/certificate](https://aje.com/certificate). If you have any questions or concerns about this edited document, please contact AJE at [support@aje.com](mailto:support@aje.com).
